# Supplementary material
Source: publisher figshare collection journal article supplement (https://karger.figshare.com/ndownloader/files/26150642)
Supplement: Supplementary file 1 [file 26150642]

Supple 2 Number (%) of deaths due to trisomy 18 syndrome from 1975 to 2016 according to survival time

|  | < 24 hours | | 1-6 days | | 7-27days | | 28-364 days | | ≥ 1 year | | Total |
| --- | --- | --- | --- | --- | --- | --- | --- | --- | --- | --- | --- |
| year of death | n | % | n | % | n | % | n | % | n | % | n |
| 1975-1980 | 12 | 4.0 | 44 | 14.6 | 52 | 17.2 | 167 | 55.3 | 27 | 8.9 | 302 |
| 1981-1986 | 36 | 6.4 | 78 | 13.8 | 133 | 23.5 | 294 | 51.9 | 25 | 4.4 | 566 |
| 1987-1992 | 47 | 6.3 | 99 | 13.2 | 163 | 21.7 | 401 | 53.5 | 40 | 5.3 | 750 |
| 1993-1998 | 111 | 11.7 | 158 | 16.7 | 187 | 19.8 | 448 | 47.4 | 41 | 4.3 | 945 |
| 1999-2004 | 183 | 18.3 | 151 | 15.1 | 175 | 17.5 | 435 | 43.6 | 54 | 5.4 | 998 |
| 2005-2010 | 197 | 20.4 | 129 | 13.4 | 99 | 10.3 | 460 | 47.7 | 80 | 8.3 | 965 |
| 2011-2016 | 224 | 21.9 | 113 | 11.1 | 81 | 7.9 | 422 | 41.3 | 181 | 17.7 | 1021 |
| All | 810 | 14.6 | 772 | 13.9 | 890 | 16.0 | 2627 | 47.4 | 448 | 8.1 | 5547 |
